# 1 **Seroprevalence of fourteen human polyomaviruses**

## 2 **determined in blood donors**

3 **Authors:** Sergio Kamminga<sup>1,2\*</sup>, Els van der Meijden<sup>2</sup>, Mariet C.W. Feltkamp<sup>2¶</sup> and Hans L.  
4 Zaaijer<sup>1¶</sup>

5 <sup>1</sup>Department of Blood-borne Infections, Sanquin Research, Amsterdam, the Netherlands.

6 <sup>2</sup>Department of Medical Microbiology, Leiden University Medical Center, Leiden, The  
7 Netherlands.

8 \* Corresponding author e-mail: [S.Kamminga@sanquin.nl](mailto:S.Kamminga@sanquin.nl) (SK)

9 ¶ These authors contributed equally to this paper.

## 10 **Abstract**

11           The polyomavirus family currently includes thirteen human polyomavirus (HPyV)  
12 species. In immunocompromised and elderly persons HPyVs are known to cause disease,  
13 such as progressive multifocal leukoencephalopathy (JCPyV), haemorrhagic cystitis and  
14 nephropathy (BKPyV), Merkel cell carcinoma (MCPyV), and trichodysplasia spinulosa  
15 (TSPyV). Some recently discovered polyomaviruses are of still unknown prevalence and  
16 pathogenic potential. Because HPyVs infections persist and might be transferred by blood  
17 components to immunocompromised patients, we studied the seroprevalence of fourteen  
18 polyomaviruses in adult Dutch blood donors. For most polyomaviruses the observed  
19 seroprevalence was high (60-100%), sometimes slightly increasing or decreasing with age.  
20 Seroreactivity increased with age for JCPyV, HPyV6 and HPyV7 and decreased for BKPyV  
21 and TSPyV. The most recently identified polyomaviruses HPyV12, NJPyV and LIPyV  
22 showed low overall seroprevalence (~5%) and low seroreactivity, questioning their human  
23 tropism. Altogether, HPyV infections are common in Dutch blood donors, with an average of  
24 nine polyomaviruses per subject.

25

## 26 **Introduction**

27           The *Polyomaviridae* family comprises non-enveloped double-stranded DNA viruses  
28 that infect a broad spectrum of hosts. After primary infection, usually in childhood, they  
29 cause asymptomatic persistent infection accompanied by low-level replication and shedding,  
30 for instance in urine [1,2]. Since 2007 the number of identified human polyomaviruses  
31 (HPyV) has greatly increased. They are currently grouped in thirteen species, including the  
32 ‘classic’ BK polyomavirus (BKPyV) and JC polyomavirus (JCPyV) [2,3]. A novel

33 polyomavirus called the Lyon IARC polyomavirus (LIPyV) that was identified in 2017 has  
34 not been assigned to a polyomavirus species yet [4].

35 BKPpyV is the main cause of polyomavirus-associated nephropathy (PVAN) that  
36 occurs in up to 10% of kidney transplant patients [5]. Haemorrhagic cystitis, also caused by  
37 BKPpyV, complicates between 6-30% of hematopoietic stem cell transplantations [6]. JCPyV  
38 causes progressive multifocal leukoencephalopathy (PML), a potentially lethal,  
39 demyelinating brain disease, which is found in HIV-infected AIDS patients,  
40 immunosuppressed transplantation patients, and nowadays especially in multiple sclerosis  
41 (MS) patients treated with immunomodulatory drugs, such as natalizumab [7]. The incidence  
42 of PML in natalizumab-treated MS patients can be as high as 20 per 1000 patients [8,9].  
43 Merkel cell polyomavirus (MCPyV) is an important cause of Merkel cell carcinoma (MCC).  
44 The incidence of MCC is low, approximately 0.4 per 100.000 person-years, though this  
45 appears to increase [10]. Less is known about the incidence of diseases caused by other  
46 polyomaviruses, for example *trichodysplasia spinulosa* caused by the trichodysplasia  
47 spinulosa polyomavirus (TSPyV) [2,11]. Karolinska Institute polyomavirus (KIPyV) and  
48 Washington University polyomavirus (WUPyV) have been implicated in respiratory disease  
49 [12–14], HPyV6 and HPyV7 in dyskeratotic dermatosis, and HPyV7 in thymomagenesis  
50 [15–18]. Furthermore, the New Jersey polyomavirus likely caused a unique but severe case of  
51 vasculitis resulting in blindness, dermatitis and myositis. Altogether, the polyomaviruses are  
52 a significant cause of disease in the immunocompromised population.

53 Blood components (red blood cells, platelets and fresh frozen plasma) are  
54 administered to haematological, transplant, and other immunocompromised patients in huge  
55 numbers. Therefore, it is important to understand the epidemiology of polyomaviruses among  
56 healthy adults and potential blood donors, including HPyVs that have been recognized just  
57 recently and of which still very little is known. In this study the seroprevalence and

58 seroreactivity were determined of fourteen polyomaviruses identified thus far in humans, in  
59 1050 Dutch blood donors subdivided into age categories. HPyV serology was performed  
60 using a custom bead-based immunoassay which was recently validated for this purpose [19].

61

## 62 **Materials and methods**

### 63 **Study population**

64 The study population consisted of serum samples from 1050 Dutch blood donors.  
65 Donors were included using weighted random selection from Dutch blood donations to obtain  
66 groups of equal size in terms of age and sex. Serum samples from eighty blood donation  
67 centres were collected over a period of two weeks to ensure an even geographic distribution  
68 over the Netherlands (Fig 1). Every blood donation in the Netherlands is routinely screened  
69 for presence of human immunodeficiency virus, hepatitis B and C virus and syphilis, only  
70 samples with a negative result were included in this study. Sex and age characteristics are  
71 summarized in Table 1. The donors were divided in five age categories: 18 – 29, 30 – 39, 40  
72 – 49, 50 – 59 and 60 – 69 years of age. In total, 529 males and 521 females were included.

73 The study involves anonymous 'left over' samples from blood donors who gave  
74 permission to use this material for studies into blood-borne agents. Hence Sanquin's scientific  
75 board, and the secretary of Sanquin's Ethical Advisory Board, decided that for this study  
76 permission from the Ethical Advisory Board is not applicable.

77

78

## 79 **Human polyomavirus multiplex immunoassay**

80 A customized, recently described Luminex xMAP assay was used to measure IgG  
81 seroreactivity against the VP1 major capsid protein of BKPyV, JCPyV, KIPyV, WUPyV,  
82 MCPyV, HPyV6, HPyV7, TSPyV, HPyV9, Malawi polyomavirus (MWPyV), Saint Louis  
83 polyomavirus (STLPyV), HPyV12, NJPyV and LIPyV [19–21]. As described, each GST-  
84 VP1 fusion protein was expressed in BL21 Rosetta bacteria and coupled to uniquely colored,  
85 glutathione-casein cross-linked magnetic fluorescent polystyrene beads.

86 In the multiplex immunoassay the 1:100 diluted serum samples were incubated for  
87 one hour in blocking buffer to suppress non-specific binding [21,22]. Biotinylated goat- $\alpha$ -  
88 human IgG (H+L) (1:1000 Jackson ImmunoResearch Laboratories Inc., West Grove, PA,  
89 USA, catalogue number: 109-065-088, antibody registry number: AB\_2337628) followed by  
90 streptavidin-R-phycoerythrin (SAPE) (1:1000 Invitrogen, Waltham, MA, USA, catalogue  
91 number: S866) were used to detect IgG responses against the individual VP1 antigens. A  
92 serially diluted mix of four serum samples with known seroreactivity against various  
93 polyomaviruses was included in each plate to measure intertest variability [19,20], which was  
94 low. The intraclass correlation coefficient for the 1:100 diluted controls was 0.91 (95%  
95 confidence interval: 0.81-0.97;  $P < 0.001$ ). Specific seroreactivity was calculated by  
96 subtracting the median fluorescence intensity (MFI) values of both a blank sample and of  
97 beads coupled to an irrelevant GST fusion protein, in this case GST-SV40 small T-antigen.  
98 Serum samples with a high response against GST-SV40 small T-antigen (resulting in specific  
99 seroreactivity below or equal to minus 1000 MFI), were excluded for further analysis ( $n=6$ ).

## 100 **Determination of the cut-off value**

101 For each HPyV a cut-off value for seropositivity was determined based on  
102 seroresponses of Dutch children ( $n=36$ ) between 10 and 15 months old, as previously  
103 described [20]. To determine a seronegative population, a frequency distribution analysis

104 with a bin width of 250 MFI was performed and samples in bins with a frequency percentage  
105 above 10% were used in the calculation of the cut-off score. The cut-off value is calculated  
106 by the mean seroresponse of the seronegative population and adding three times the standard  
107 deviation. This resulted in the following cut-off values, expressed as MFI, for BKPyV 391,  
108 JCPyV 349, KIPyV 341, WUPyV 403, MCPyV 509, HPyV6 322, HPyV7 1069, TSPyV 346,  
109 HPyV9 446, MWPyV 325, STLPyV 357, HPyV12 326, NJPyV 994, and LIPyV 438.

## 110 **Statistical analysis**

111 Statistical analysis was performed in IBM SPSS Statistics 23. Intraclass correlation  
112 coefficient was calculated based on a single measures form, absolute-agreement and 2-way  
113 mixed-effects model. Associations between categorical variables (e.g. sex, age categories)  
114 and seropositivity were analysed by  $\chi^2$  test (for trend) or Fisher's exact test where  
115 appropriate. Mann-Whitney U test was used to analyse differences in seropositivity numbers  
116 between the different age categories per donor. Seroreactivity was not normally distributed  
117 and was therefore analysed by a non-parametric test, Jonckheere's trend test for ordinal  
118 variables (in this case the association between age and seroreactivity in seropositive samples).

119

## 120 **Results**

### 121 **Human polyomavirus seroprevalence**

122 In 1050 Dutch blood donors, the seroprevalence of each polyomavirus was  
123 determined by calculating the proportion of serum samples with seroreactivity above the  
124 established MFI cut-off points. For the majority of polyomaviruses, the overall seropositivity  
125 was high, at least 60% (Fig 2 and Table 2). However, for HPyV9 and especially for HPyV12,

126 NJPyV and LIPyV the overall seropositivity was low, 19.2%, 4.0%, 5.2% and 5.9%  
127 respectively. When the seroprevalences were analysed in relation to age, a significant positive  
128 association was observed for KIPyV ( $P < 0.001$ ), HPyV6 ( $P < 0.001$ ), HPyV7 ( $P < 0.001$ ) and  
129 TSPyV ( $P = 0.04$ ). For MCPyV, a negative association between seroprevalence and age was  
130 observed ( $P = 0.013$ ). Due to low numbers of seropositives, age comparisons were not  
131 performed for HPyV12, NJPyV and LIPyV. For all HPyVs no significant differences in  
132 seropositivity were observed related to sex.

133 All blood donors were seropositive for at least four polyomaviruses. The mean  
134 number of infections per donor ( $\pm$  SD), based on seropositivity, was  $8.7 \pm 1.6$  per subject (Fig  
135 3). Participants in the lowest age category (18-29) had a mean of  $8.2 \pm 1.6$  infections, which  
136 was significantly lower ( $P \leq 0.001$ ) than the other age categories, which showed a mean  
137 number of infections as follows: 30-39 years:  $8.8 \pm 1.7$ , 40-49 years:  $8.7 \pm 1.5$ , 50-59 years:  
138  $8.7 \pm 1.5$ , and 60-69 years:  $8.9 \pm 1.6$ . No differences regarding the mean number of infections  
139 per donor were observed between the sexes.

## 140 **Human polyomavirus seroreactivity**

141 Seroreactivity detected in seropositive donors differed between the analysed HPyVs.  
142 The highest median MFI-values were measured for BKPyV (Fig 4). Intermediate values were  
143 measured for KIPyV, WUPyV, MCPyV, HPyV6, HPyV7, TSPyV and MWPyV. Low to  
144 intermediate median MFI values were measured for JCPyV, HPyV9 and STLPyV, although  
145 some highly reactive serum samples were noted for HPyV9. The seroresponses against  
146 HPyV12, NJPyV and LIPyV were generally very low.

147 Seroreactivity was further analysed in relation to age by investigating potential trends  
148 within the five age-categories shown in Fig 4. A significant age-dependent increase of  
149 seroreactivity was observed for JCPyV, HPyV6 and HPyV7 ( $P < 0.001$ ,  $P < 0.001$  and  $P = 0.047$ ,

150 respectively). For HPyV9 a substantial increase was seen for the 60-69 age category. In  
151 contrast, for BKPyV and TSPyV a significant decrease of seroreactivity was observed in the  
152 higher age categories ( $P < 0.001$  for both viruses). No significant trends were observed for the  
153 other HPyVs. The analyses were not performed for HPyV12, NJPyV and LIPyV, due to low  
154 numbers of seropositives.

155 In general, no differences in seroreactivity between the sexes were observed, but for  
156 HPyV7 the overall median seroreactivity among seropositives was higher in men (9250 MFI  
157 in men vs. 6464 MFI in women,  $P = 0.018$ ).

158

## 159 Discussion

160 In this study we determined the seroprevalence and seroreactivity of all currently  
161 known human polyomaviruses in a large Dutch blood donor cohort. Our findings indicate that  
162 seropositivity for a large number of polyomaviruses is common in this healthy population. At  
163 the same time, for some recently identified HPyVs the seroprevalence was low.

164 With regard to most HPyVs that have been serologically analysed before, the  
165 seroprevalences reported here are in line with previous seroepidemiological studies in  
166 immunocompetent populations from different continents [11,19,20,23–28], therefore we  
167 assume our findings to be representative for most other immunocompetent populations. For  
168 KIPyV, HPyV6, HPyV7 and TSPyV an increase in seroprevalence with higher age was  
169 noticed, which has also been reported previously [20,23–26]. This could reflect continuous  
170 viral exposure throughout life or frequent reactivation of persistent infection, which can boost  
171 HPyV seroresponses as well [29]. Furthermore, we observed a decrease in seroprevalence



172 with age for MCPyV, which was not published before to our knowledge, [20,23,24], and  
173 could represent a cohort effect. HPyV infections with a stable seroprevalence in adult life are  
174 probably acquired during childhood, as previously indicated by a rapid increase in  
175 seropositivity during the first years of life [20,24,30]. Due to the age restrictions on becoming  
176 a blood donor in the Netherlands, we did not investigate the HPyV seroreactivity patterns in  
177 individuals under 18 years of age or older than 69.

178 The seroreactivity of seropositive individuals differed with age between the HPyVs,  
179 with decreasing intensity for BKPyV and TSPyV, increasing intensity for JCPyV, HPyV6  
180 and HPyV7, and stable intensity for KIPyV, WUPyV, MWPyV and STLPyV. Comparable  
181 trends were obtained in healthy Australian, Czech and Italian populations [20,25,26,31,32],  
182 though MCPyV seroreactivity did not increase with age in our cohort. The decrease in  
183 seroreactivity for BKPyV and TSPyV suggests gradually less immunological boosting,  
184 possibly related to a decrease in environmental exposure or diminished reactivation of these  
185 HPyVs, while the increase in seroreactivity seen for JCPyV, HPyV6 and HPyV7 might  
186 reflect continuous exposure or reactivation [29].

187 The serological profile of HPyV9 is unique compared to other polyomaviruses, with a  
188 small subset of seropositive individuals that display very high seroreactivity in a background  
189 of weak seroresponders. It was previously shown that HPyV9 has unique receptor binding  
190 properties, and preferentially binds to a ligand which cannot be synthesized by humans, but  
191 can be acquired through diet (red meat and milk) [33]. The necessity for a dietary ligand  
192 might explain why this virus is less prevalent among humans than most other HPyVs.  
193 Whether highly HPyV9-seroreactive subjects indeed ingest more dairy and meat-containing  
194 products could be the subject of further study.

195 For HPyV12, NJPyV and LIPyV we detected a very low seroprevalence,  
196 approximately 5%, with low seroreactivity for all three. In a pilot study, we obtained similar

197 results and confirmed the antigenicity of the used HPyV12- and NJPyV-VP1 antigens by  
198 specific polyclonal antibody recognition [19]. Therefore, we believe the observed low  
199 seroprevalence of these polyomaviruses to be genuine, and we consider the possibility that  
200 these polyomaviruses do not frequently circulate in humans, and perhaps do not represent  
201 human polyomaviruses at all. For HPyV12, this would fit with recent observations suggesting  
202 that HPyV12 represents a shrew rather than a human polyomavirus [34]. For NJPyV it could  
203 very well be that the only published patient was infected from an animal reservoir under  
204 exceptional circumstances, when fleeing from flooding during hurricane Sandy [35]. LIPyV  
205 was identified in a skin swab sample and subsequently detected in a small subset of oral  
206 fluids (2%), skin swabs (2%) and eyebrow hair follicles (0.2%) [4]. In this case, the measured  
207 low seroprevalence might reflect the LIPyV detection rate, though more studies are needed to  
208 further clarify the epidemiology of LIPyV.

209         In contrast to our data, a very recent study reported 90% seroprevalence for HPyV12,  
210 in an Italian adult population [36]. This percentage is considerably higher than our finding  
211 and the 20% seroprevalence obtained previously for HPyV12 by Ehlers and co-workers using  
212 recombinant VP1 and VP1-based VLP ELISA [34,37]. Since HPyV VP1-based and VLP  
213 based assays generally obtain comparable results, as we have recently demonstrated for  
214 BKPyV [19], we have no explanation thus far for this large discrepancy except differences in  
215 cut-off value determination and striking geographic differences in virus exposure. Suboptimal  
216 HPyV12 antigen recognition, resulting from the use of a premature translation initiation site  
217 in HPyV12 VP1, causing a 16 amino acids longer version of VP1 [38], was experimentally  
218 ruled out (S1 Fig). Also for NJPyV a much higher seroprevalence was found in the Italian  
219 population (50%) than in our population (5%) [36]. Overall, more (sero)epidemiological  
220 studies are needed to solve these discrepancies and to define the natural host(s) of these

221 viruses, for example by studying seroprevalence in different geographic regions while using  
222 comparable serological methods.

223 In conclusion, by analysing a large group of Dutch blood donors we showed that most  
224 HPyV infections are common, although we found little indication of HPyV12, NJPyV and  
225 LIPyV circulation in humans. Considering that blood donors are persistently infected with, on  
226 average, nine different polyomaviruses and assuming that episodes of viremia sometimes  
227 occur, the consequences for the safety of blood transfusion, especially for  
228 immunocompromised recipients, remains to be established.

229

## 230 **Acknowledgements**

231 The authors would like to thank Ed Bakker for his help with the collection of the  
232 serum samples and Boris Hogema for his help with proper selection of the donations.

233

## 234 **References**

- 235 1. Egli A, Infanti L, Dumoulin A, Buser A, Samaridis J, Stebler C, et al. Prevalence of Polyomavirus  
236 BK and JC Infection and Replication in 400 Healthy Blood Donors. *J Infect Dis.* 2009;199: 837–  
237 846. doi:10.1086/597126
- 238 2. Feltkamp MCW, Kazem S, van der Meijden E, Lauber C, Gorbalenya AE. From Stockholm to  
239 Malawi: recent developments in studying human polyomaviruses. *J Gen Virol.* 2013;94: 482–  
240 496. doi:10.1099/vir.0.048462-0
- 241 3. Moens U, Krumbholz A, Ehlers B, Zell R, Johne R, Calvignac-Spencer S, et al. Biology, evolution,  
242 and medical importance of polyomaviruses: An update. *Infect Genet Evol.* 2017;54: 18–38.  
243 doi:10.1016/j.meegid.2017.06.011
- 244 4. Gheit T, Dutta S, Oliver J, Robitaille A, Hampras S, Combes J-D, et al. Isolation and  
245 characterization of a novel putative human polyomavirus. *Virology.* 2017;506: 45–54.  
246 doi:10.1016/j.virol.2017.03.007
- 247 5. Hirsch HH, Brennan DC, Drachenberg CB, Ginevri F, Gordon J, Limaye AP, et al. Polyomavirus-  
248 associated nephropathy in renal transplantation: interdisciplinary analyses and  
249 recommendations. *Transplantation.* 2005;79: 1277–1286.
- 250 6. Foster JH, Cheng WS, Nguyen N-Y, Krance R, Martinez C. Intravesicular cidofovir for BK  
251 hemorrhagic cystitis in pediatric patients after hematopoietic stem cell transplant. *Pediatr*  
252 *Transplant.* 2018; doi:10.1111/ptr.13141
- 253 7. Reuwer AQ, Heron M, van der Dussen D, Schneider-Hohendorf T, Murk J I. The clinical utility of  
254 JC virus antibody index measurements in the context of progressive multifocal  
255 leukoencephalopathy. *Acta Neurol Scand.* 2017;136: 37–44. doi:10.1111/ane.12840
- 256 8. Vennegoor A, van Rossum JA, Polman CH, Wattjes MP, Killestein J. Longitudinal JCV serology in  
257 multiple sclerosis patients preceding natalizumab-associated progressive multifocal  
258 leukoencephalopathy. *Mult Scler J.* 2015;21: 1600–1603. doi:10.1177/1352458514567728
- 259 9. Schwab N, Schneider-Hohendorf T, Melzer N, Cutter G, Wiendl H. Natalizumab-associated PML:  
260 Challenges with incidence, resulting risk, and risk stratification. *Neurology.* 2017;88: 1197–  
261 1205. doi:10.1212/WNL.0000000000003739
- 262 10. Fondain M, Dereure O, Uhry Z, Guizard AV, Woronoff AS, Colonna M, et al. Merkel cell  
263 carcinoma in France: A registries-based, comprehensive epidemiological survey. *J Eur Acad*  
264 *Dermatol Venereol JEADV.* 2018; doi:10.1111/jdv.14798
- 265 11. DeCaprio JA, Garcea RL. A cornucopia of human polyomaviruses. *Nat Rev Microbiol.* 2013;11:  
266 264–276. doi:10.1038/nrmicro2992
- 267 12. Dehority WN, Eickman MM, Schwalm KC, Gross SM, Schroth GP, Young SA, et al. Complete  
268 genome sequence of a KI polyomavirus isolated from an otherwise healthy child with severe  
269 lower respiratory tract infection. *J Med Virol.* 2017;89: 926–930. doi:10.1002/jmv.24706
- 270 13. Teramoto S, Koseki N, Yoshioka M, Matsunami Y, Yanazume N, Nawate M, et al. WU  
271 Polyomavirus Infection Confirmed by Genetic and Serologic Tests in an Infant With Bronchitis.  
272 *Pediatr Infect Dis J.* 2011;30: 918. doi:10.1097/INF.0b013e3182252148

- 273 14. Siebrasse EA, Nguyen NL, Willby MJ, Erdman DD, Menegus MA, Wang D. Multiorgan WU  
274 Polyomavirus Infection in Bone Marrow Transplant Recipient. *Emerg Infect Dis.* 2016;22: 24–  
275 31. doi:10.3201/eid2201.151384
- 276 15. Nguyen KD, Lee EE, Yue Y, Stork J, Pock L, North JP, et al. Human polyomavirus 6 and 7 are  
277 associated with pruritic and dyskeratotic dermatoses. *J Am Acad Dermatol.* 2017;76: 932–  
278 940.e3. doi:10.1016/j.jaad.2016.11.035
- 279 16. Ho J, Jedrych JJ, Feng H, Natalie AA, Grandinetti L, Mirvish E, et al. Human Polyomavirus 7–  
280 Associated Pruritic Rash and Viremia in Transplant Recipients. *J Infect Dis.* 2015;211: 1560–  
281 1565. doi:10.1093/infdis/jiu524
- 282 17. Rennspiess D, Pujari S, Keijzers M, Abdul-Hamid MA, Hochstenbag M, Dingemans A-M, et al.  
283 Detection of Human Polyomavirus 7 in human thymic epithelial tumors. *J Thorac Oncol Off*  
284 *Publ Int Assoc Study Lung Cancer.* 2015;10: 360–366. doi:10.1097/JTO.0000000000000390
- 285 18. Keijzers M, Rennspiess D, Pujari S, Abdul-Hamid MA, Hochstenbag M, Dingemans A-M, et al.  
286 Expression of pRb and p16INK4 in human thymic epithelial tumors in relation to the presence  
287 of human polyomavirus 7. *Diagn Pathol.* 2015;10. doi:10.1186/s13000-015-0418-6
- 288 19. Kamminga S, van der Meijden E, Wunderink HF, Touzé A, Zaaijer HL, Feltkamp MCW.  
289 Development and evaluation of a broad bead-based multiplex immunoassay to measure IgG  
290 seroreactivity against human polyomaviruses. *J Clin Microbiol.* 2018; doi:10.1128/JCM.01566-  
291 17
- 292 20. van der Meijden E, Bialasiewicz S, Rockett RJ, Tozer SJ, Sloots TP, Feltkamp MCW. Different  
293 Serologic Behavior of MCPyV, TSPyV, HPyV6, HPyV7 and HPyV9 Polyomaviruses Found on the  
294 Skin. *PLoS ONE.* 2013;8. doi:10.1371/journal.pone.0081078
- 295 21. Waterboer T, Sehr P, Michael KM, Franceschi S, Nieland JD, Joos TO, et al. Multiplex Human  
296 Papillomavirus Serology Based on In Situ–Purified Glutathione S-Transferase Fusion Proteins.  
297 *Clin Chem.* 2005;51: 1845–1853. doi:10.1373/clinchem.2005.052381
- 298 22. Waterboer T, Sehr P, Pawlita M. Suppression of non-specific binding in serological Luminex  
299 assays. *J Immunol Methods.* 2006;309: 200–204. doi:10.1016/j.jim.2005.11.008
- 300 23. Gossai A, Waterboer T, Nelson HH, Michel A, Willhauck-Fleckenstein M, Farzan SF, et al.  
301 Seroepidemiology of Human Polyomaviruses in a US Population. *Am J Epidemiol.* 2016;183:  
302 61–69. doi:10.1093/aje/kwv155
- 303 24. Kean JM, Rao S, Wang M, Garcea RL. Seroepidemiology of human polyomaviruses. *PLoS*  
304 *Pathog.* 2009;5: e1000363. doi:10.1371/journal.ppat.1000363
- 305 25. Šroller V, Hamšíková E, Ludvíková V, Musil J, Němečková Š, Saláková M. Seroprevalence rates  
306 of HPyV6, HPyV7, TSPyV, HPyV9, MWPyV and KIPyV polyomaviruses among the healthy blood  
307 donors. *J Med Virol.* 2016;88: 1254–1261. doi:10.1002/jmv.24440
- 308 26. Nicol JTJ, Robinot R, Carpentier A, Carandina G, Mazzoni E, Tognon M, et al. Age-Specific  
309 Seroprevalences of Merkel Cell Polyomavirus, Human Polyomaviruses 6, 7, and 9, and  
310 Trichodysplasia Spinulosa-Associated Polyomavirus. *Clin Vaccine Immunol CVI.* 2013;20: 363–  
311 368. doi:10.1128/CVI.00438-12

- 312 27. Antonsson A, Neale RE, O'Rourke P, Wockner L, Michel A, Pawlita M, et al. Prevalence and  
313 stability of antibodies to thirteen polyomaviruses and association with cutaneous squamous  
314 cell carcinoma: A population-based study. *J Clin Virol*. 2018;101: 34–37.  
315 doi:10.1016/j.jcv.2018.01.013
- 316 28. Lim ES, Meinerz NM, Primi B, Wang D, Garcea RL. Common Exposure to STL Polyomavirus  
317 During Childhood. *Emerg Infect Dis*. 2014;20: 1559–1561. doi:10.3201/eid2009.140561
- 318 29. Wunderink HF, van der Meijden E, van der Blij-de Brouwer CS, Zaaijer HL, Kroes ACM, van Zwet  
319 EW, et al. Stability of BK polyomavirus IgG seroreactivity and its correlation with preceding  
320 viremia. *J Clin Virol Off Publ Pan Am Soc Clin Virol*. 2017;90: 46–51.  
321 doi:10.1016/j.jcv.2017.03.015
- 322 30. Cason C, Monasta L, Zanotta N, Campisciano G, Maestri I, Tommasino M, et al. Antibody  
323 response to polyomavirus primary infection: high seroprevalence of Merkel cell polyomavirus  
324 and lymphoid tissue involvement. *J Neurovirol*. 2018; 1–9. doi:10.1007/s13365-017-0612-2
- 325 31. Šroller V, Hamšíková E, Ludvíková V, Vochozková P, Kojzarová M, Fraiberk M, et al.  
326 Seroprevalence rates of BKV, JCV, and MCPyV polyomaviruses in the general Czech Republic  
327 population. *J Med Virol*. 2014;86: 1560–1568. doi:10.1002/jmv.23841
- 328 32. van der Meijden E, Kazem S, Burgers MM, Janssens R, Bavinck JNB, de Melker H, et al.  
329 Seroprevalence of Trichodysplasia Spinulosa–associated Polyomavirus. *Emerg Infect Dis*.  
330 2011;17: 1355–1363. doi:10.3201/eid1708.110114
- 331 33. Khan ZM, Liu Y, Neu U, Gilbert M, Ehlers B, Feizi T, et al. Crystallographic and glycan microarray  
332 analysis of human polyomavirus 9 VP1 identifies N-glycolyl neuraminic acid as a receptor  
333 candidate. *J Virol*. 2014;88: 6100–6111. doi:10.1128/JVI.03455-13
- 334 34. Gedvilaite A, Tryland M, Ulrich RG, Schneider J, Kurmauskaite V, Moens U, et al. Novel  
335 polyomaviruses in shrews (Soricidae) with close similarity to human polyomavirus 12. *J Gen  
336 Virol*. 2017; doi:10.1099/jgv.0.000948
- 337 35. Mishra N, Pereira M, Rhodes RH, An P, Pipas JM, Jain K, et al. Identification of a novel  
338 polyomavirus in a pancreatic transplant recipient with retinal blindness and vasculitic  
339 myopathy. *J Infect Dis*. 2014;210: 1595–1599. doi:10.1093/infdis/jiu250
- 340 36. Gaboriaud P, Ferté M, Arnold F, Leblond V, Nicol J, Debare H, et al. Age-specific seroprevalence  
341 of human polyomavirus 12 and Saint Louis and New Jersey polyomaviruses. *Emerg Microbes  
342 Infect*. 2018;7: 22. doi:10.1038/s41426-018-0026-0
- 343 37. Korup S, Rietscher J, Calvignac-Spencer S, Trusch F, Hofmann J, Moens U, et al. Identification of  
344 a novel human polyomavirus in organs of the gastrointestinal tract. *PloS One*. 2013;8: e58021.  
345 doi:10.1371/journal.pone.0058021
- 346 38. Norkiene M, Stonyte J, Ziogiene D, Mazeike E, Sasnauskas K, Gedvilaite A. Production of  
347 recombinant VP1-derived virus-like particles from novel human polyomaviruses in yeast. *BMC  
348 Biotechnol*. 2015;15. doi:10.1186/s12896-015-0187-z

349

350

351 **Fig 1. Geographic distribution of blood donors.** The geographic origin of 1050 collected  
352 serum samples in the Netherlands is shown in a map by the location of the collection centres  
353 involved. Samples were collected over a period of two weeks to ensure the inclusion of blood  
354 donation centres from all regions of the Netherlands. The number of samples from each  
355 location is visualized by increasing circle size parallel to the number of samples from that  
356 location, with a minimum of 1 and a maximum of 51 samples from individual centres.

357 **Fig 2. Seroprevalence of indicated polyomaviruses in Dutch blood donors.** The  
358 percentage seropositivity of each polyomavirus is shown for the donor age categories 18-29  
359 (checkers pattern, N=206), 30-39 (solid white bars, N=207), 40-49 (dots pattern, N=207), 50-  
360 59 (light grey bars, N=215) and 60-69 (diagonally striped pattern, N=209).

361 **Fig 3. Distribution of the number of polyomavirus infections per donor.** The distribution  
362 of the number of infecting polyomaviruses is shown among the tested blood donors, as  
363 indicated by seropositivity.

364 **Fig 4. The level of polyomavirus seroreactivity in seropositive donors categorized by**  
365 **age.** Box plots with whiskers represent 1-99<sup>th</sup> percentiles. Outliers are indicated by triangles.  
366 Age categories shown are 18-29 (checkers pattern), 30-39 (solid white bars), 40-49 (dots  
367 pattern), 50-59 (light grey bars) and 60-69 (diagonally striped pattern). Only MFI values from  
368 seropositive donors are shown. The total number of seropositives was for BKPyV: 1033;  
369 JCPyV: 660; KIPyV: 957; WUPyV: 1033; MCPyV: 855; HPyV6: 875; HPyV7: 749; TSPyV:  
370 831; HPyV9: 200; MWPyV: 1039; STLPyV: 677; HPyV12: 42; NJPyV: 54; LIPyV: 62.

371

372 **Table 1. Demographics of study population**

|                     | Sex   |        | Total |     |
|---------------------|-------|--------|-------|-----|
|                     | Male  | Female |       |     |
| 18-29               | 103   | 105    | 208   |     |
| 30-39               | 106   | 103    | 209   |     |
| <b>Age category</b> | 40-49 | 106    | 102   | 208 |
|                     | 50-59 | 110    | 105   | 215 |
|                     | 60-69 | 104    | 106   | 210 |
| <b>Total</b>        | 529   | 521    | 1050  |     |

373

374 **Table 2. Seropositivity numbers and seroprevalence**

|                     | Total                  | Sex        |            | Age category |            |             |             |            |
|---------------------|------------------------|------------|------------|--------------|------------|-------------|-------------|------------|
|                     |                        | Male       | Female     | 18-29        | 30-39      | 40-49       | 50-59       | 60-69      |
| <b>Polyomavirus</b> | (N=1044 <sup>a</sup> ) | (N=527)    | (N=517)    | (N=206)      | (N=207)    | (N=207)     | (N=215)     | (N=209)    |
| <b>type</b>         | No. (%)                | No. (%)    | No. (%)    | No. (%)      | No. (%)    | No. (%)     | No. (%)     | No. (%)    |
| BKPyV               | 1033 (98.9)            | 523 (99.2) | 510 (98.6) | 204 (99.0)   | 205 (99.0) | 204 (98.6)  | 213 (99.1)  | 207 (99.0) |
| JCPyV               | 660 (63.2)             | 336 (63.8) | 324 (62.7) | 120 (58.3)   | 138 (66.7) | 128 (61.8)  | 133 (61.9)  | 141 (67.5) |
| KIPyV**             | 957 (91.6)             | 483 (91.7) | 474 (91.7) | 164 (79.6)   | 191 (92.3) | 196 (94.7)  | 202 (94.0)  | 204 (97.6) |
| WUPyV               | 1033 (98.9)            | 521 (98.9) | 512 (99.0) | 204 (99.0)   | 204 (98.6) | 205 (99.0)  | 213 (99.1)  | 207 (99.0) |
| MCPyV*              | 855 (81.9)             | 429 (81.4) | 426 (82.4) | 178 (86.4)   | 168 (81.2) | 178 (86.0)  | 170 (79.1)  | 161 (77.0) |
| HPyV6**             | 875 (83.8)             | 444 (84.3) | 431 (83.4) | 156 (75.7)   | 175 (84.5) | 173 (83.6)  | 184 (85.6)  | 187 (89.5) |
| HPyV7**             | 749 (71.7)             | 391 (74.2) | 358 (69.2) | 117 (56.8)   | 154 (74.4) | 155 (74.9)  | 154 (71.6)  | 169 (80.9) |
| TSPyV*              | 831 (79.6)             | 431 (81.8) | 400 (77.4) | 156 (75.7)   | 160 (77.3) | 163 (78.7)  | 183 (85.1)  | 169 (80.9) |
| HPyV9               | 200 (19.2)             | 91 (17.3)  | 109 (21.1) | 44 (21.4)    | 43 (20.8)  | 40 (19.3)   | 36 (16.7)   | 37 (17.7)  |
| MWPyV               | 1039 (99.5)            | 523 (99.2) | 516 (99.8) | 205 (99.5)   | 205 (99.0) | 207 (100.0) | 215 (100.0) | 207 (99.0) |
| STLPyV              | 677 (64.8)             | 342 (64.9) | 335(64.8)  | 118 (57.3)   | 145 (70.0) | 139 (67.1)  | 143 (66.5)  | 132 (63.2) |
| HPyV12              | 42 (4.0)               | 15 (2.8)   | 27 (5.2)   | 11 (5.3)     | 10 (4.8)   | 5 (2.4)     | 4 (1.9)     | 12 (5.7)   |
| NJPyV               | 54 (5.2)               | 22 (4.2)   | 32 (6.2)   | 8 (3.9)      | 4 (1.9)    | 4 (1.9)     | 16 (7.4)    | 22 (10.5)  |
| LIPyV               | 62 (5.9)               | 33 (6.3)   | 29 (5.6)   | 10 (4.9)     | 14 (6.8)   | 10 (4.8)    | 14 (6.5)    | 14 (6.7)   |

375 a. 6 samples were excluded due to GST-SV40 small T reactivity.

376 \* P < 0.05 \*\* P<0.001  $\chi^2$  test for trend for differences between age categories.

377



## 378 Supporting information

379 **S1 Fig. HPyV12 seroreactivity.** Based on VP1 sequence alignment, the translation initiation  
380 site of the HPyV12-VP1 sequence may be located 48 nucleotides (16 amino acids)  
381 downstream of the 5' end of the VP1 open reading frame. In order to compare the  
382 antigenicity, both the 380 amino acids long version and the 364 amino acids long version of  
383 the HPyV12-VP1 protein were expressed and used to analyse a cohort of kidney transplant  
384 recipients (n=65). The seroreactivity measured with each protein was similar (Pearson  $R^2 =$   
385 0.99).

386 **S2 File. Dataset.** Dataset containing population characteristics and immunoassay results.

387

388 **Fig 1**

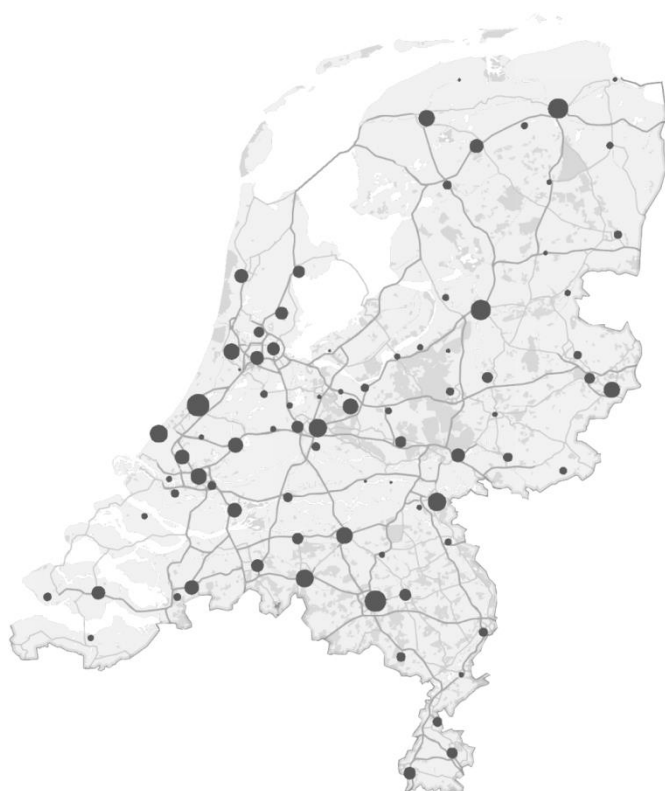

389

390

391 **Fig 2**

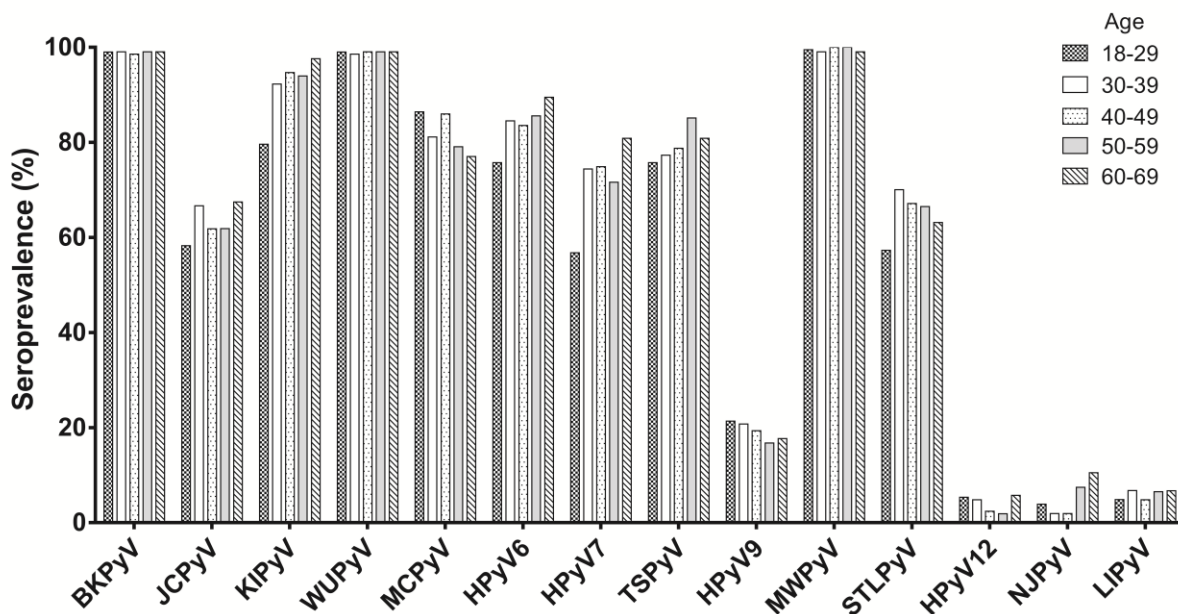

392

393 **Fig 3**

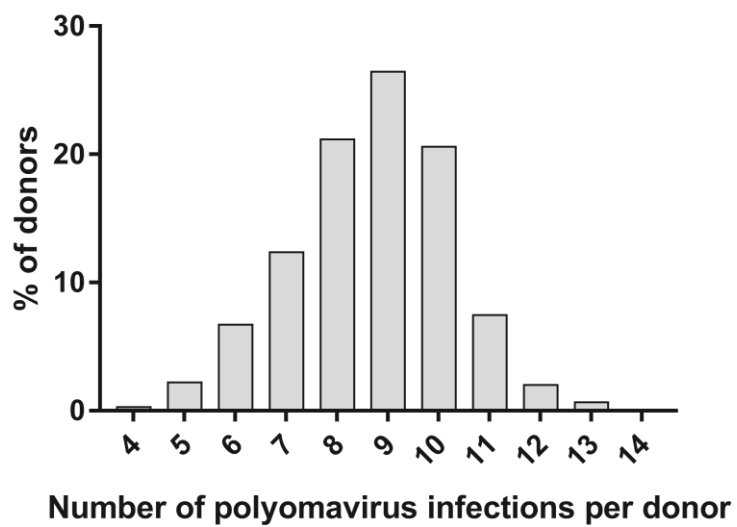

394

395

396 **Fig 4**

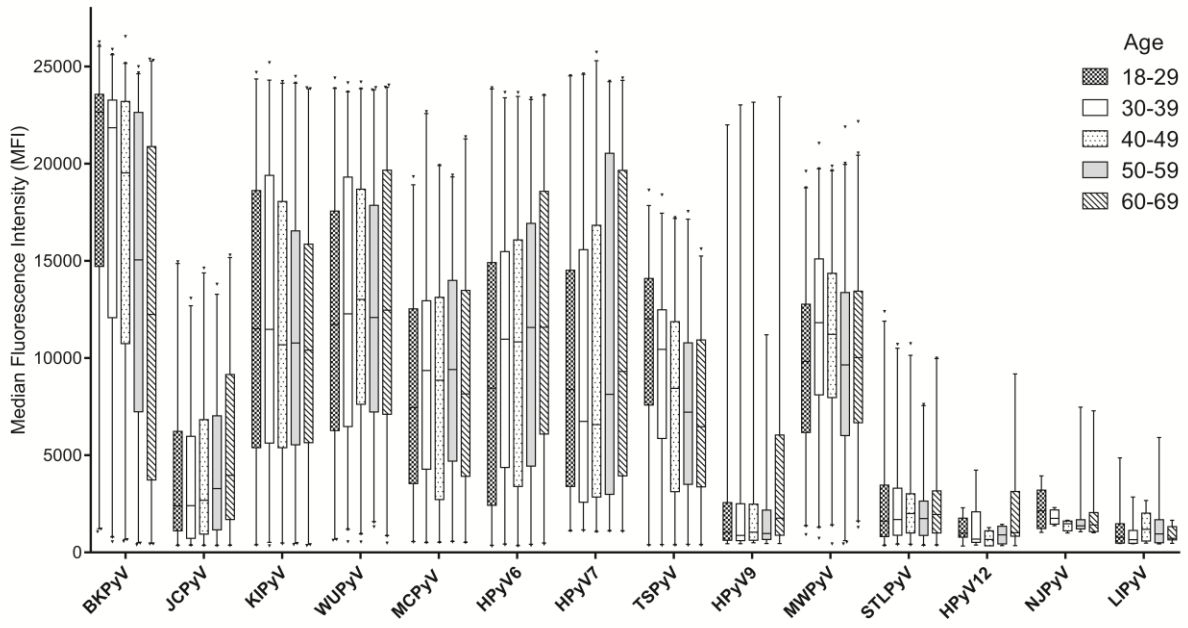

397

398
